# Supplementary material
Source: PubMed Central journal article supplement (PMC6501560)
Supplement: NIHMS1009197-supplement-SI.pdf [file NIHMS1009197-supplement-SI.pdf]

*“Supporting Information”*

**Ultra-low Fouling and Functionalizable Surface Chemistry Based on  
Zwitterionic Carboxybetaine Random Copolymers**

Xiaojie Lin,<sup>†</sup> Priyesh Jain,<sup>†</sup> Kan Wu,<sup>†</sup> Daewha Hong,<sup>†</sup> Hsiang-Chieh Hung,<sup>†</sup> Mary  
Beth O’Kelly,<sup>†</sup> Bowen Li,<sup>‡</sup> Peng Zhang,<sup>†</sup> Zhefan Yuan,<sup>†</sup> Shaoyi Jiang<sup>\*,†,‡</sup>

<sup>†</sup>Department of Chemical Engineering, <sup>‡</sup>Department of Bioengineering,  
University of Washington,  
Seattle, Washington 98195, United States

**Corresponding Author**

Fax: +1 (206) 685-3451. E-mail: [sjiang@uw.edu](mailto:sjiang@uw.edu)

Figure S-1.

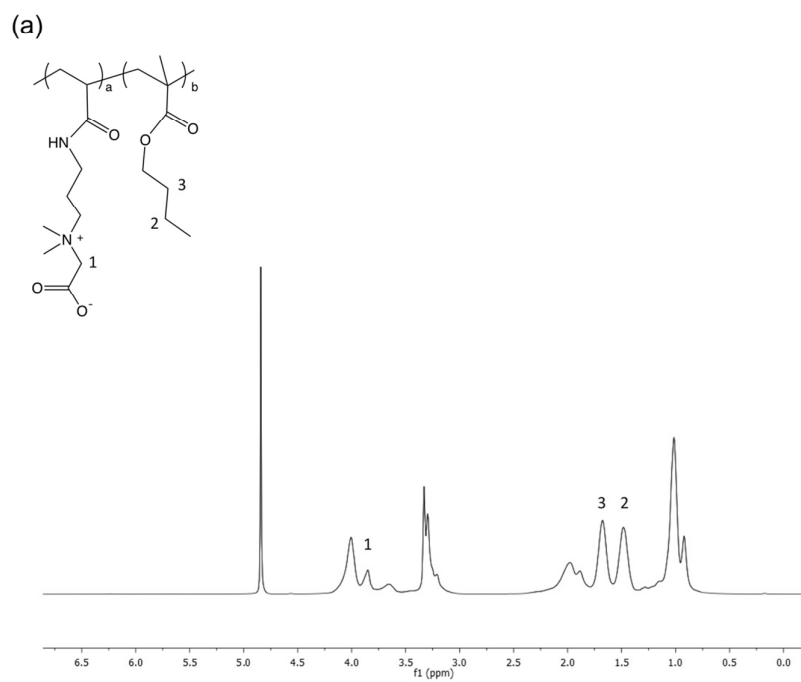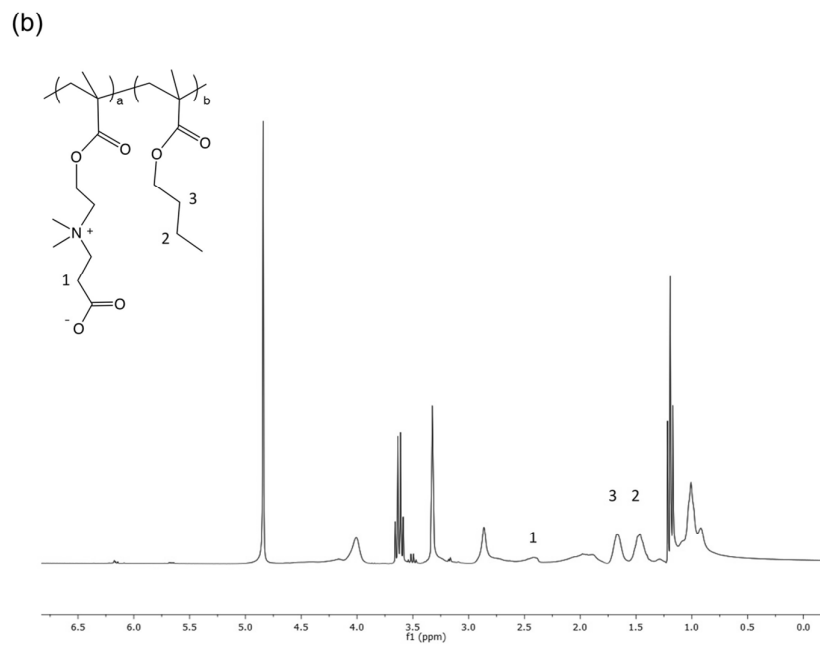

**Figure S-1.**  $^1\text{H-NMR}$  spectrum of (a) poly(CB1-*co*-BMA) (PCB1); and (b) poly(CB2-*co*-BMA) (PCB2). CB1: 1-Carboxy-*N,N*-dimethyl-*N*-(3'-acrylamidopropyl) ethanaminium inner salt; CB2: carboxybetaine methacrylate, 2-carboxy-*N,N*-dimethyl-*N*-(2'-methacryloyloxyethyl) ethanaminium inner salt; BMA: *n*-butyl methacrylate.

**Figure S-2.**

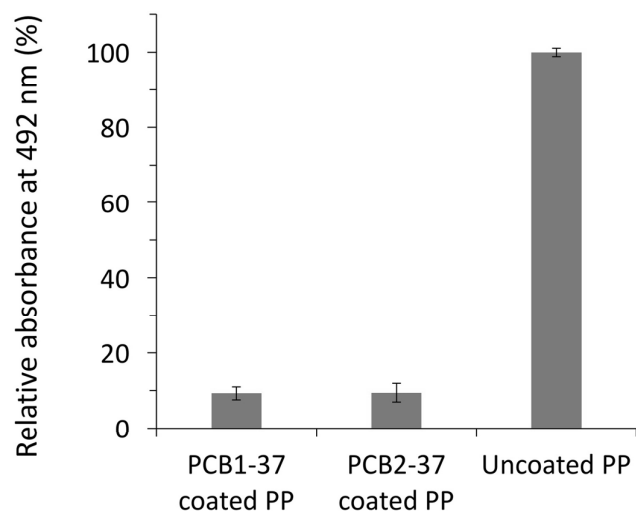

**Figure S-2.** Relative adsorption of fibrinogen (1.0 mg/mL, 1× PBS, pH 7.4) on PP surfaces coated with (a) PCB1-37 and (b) PCB2-37 at 0.5 wt% concentration.
